# Supplementary material for: Design, Synthesis, and Biological Evaluation of [1,2,5]Oxadiazolo[3,4-b]pyridin-7-ol as Mitochondrial Uncouplers for the Treatment of Obesity and Metabolic Dysfunction-Associated Steatohepatitis
Source: PubMed Central journal article supplement (PMC11647902; doi:10.1021/acs.jmedchem.4c02366), 2024-11-30

## Supporting Information

### Design, Synthesis and Biological Evaluation of [1,2,5]oxadiazolo[3,4-*b*]pyridin-7-ol as Mitochondrial Uncouplers for the Treatment of Obesity and Metabolic Dysfunction-Associated Steatohepatitis

Mary A. Foutz,<sup>1</sup> Emily L. Krinos,<sup>1</sup> Martina Beretta,<sup>2</sup> Stefan R. Hargett,<sup>3</sup> Riya Shrestha,<sup>2</sup> Jacob H. Murray,<sup>1</sup> Ethan Duerre,<sup>1</sup> Joseph M. Salamoun,<sup>1</sup> Katrina McCarter,<sup>1</sup> Divya P. Shah,<sup>2</sup> Kyle L. Hoehn,<sup>2,3,\*</sup> Webster L. Santos<sup>1,\*</sup>

<sup>1</sup>Department of Chemistry and Virginia Tech Center for Drug Discovery, Virginia Tech, Blacksburg, Virginia 24061, United States.

<sup>2</sup>School of Biotechnology and Biomolecular Sciences, University of New South Wales, Kensington, NSW 2033, Australia.

<sup>3</sup>Departments of Pharmacology and Medicine, University of Virginia, Charlottesville, Virginia 22908, United States.

\*Corresponding Author Email: [santosw@vt.edu](mailto:santosw@vt.edu), [k.hoehn@unsw.edu.au](mailto:k.hoehn@unsw.edu.au)

|                                                           |    |
|-----------------------------------------------------------|----|
| UPLC of compound 7ao, 7ap, 7al, and 7m (SHO1122147):..... | S2 |
| <sup>1</sup> H, <sup>13</sup> C NMR of SHO1122147 .....   | S4 |
| HRMS of SHO1122147 .....                                  | S5 |

UPLC:

**7ao**

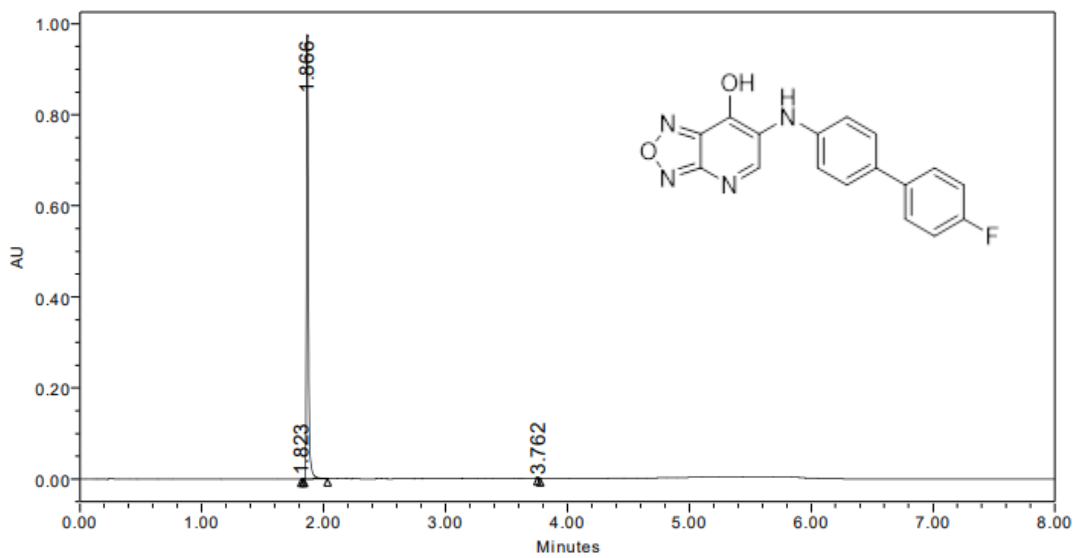

Method one used. Retention time 1.87 minutes, percent purity 99.90%

**7ap**

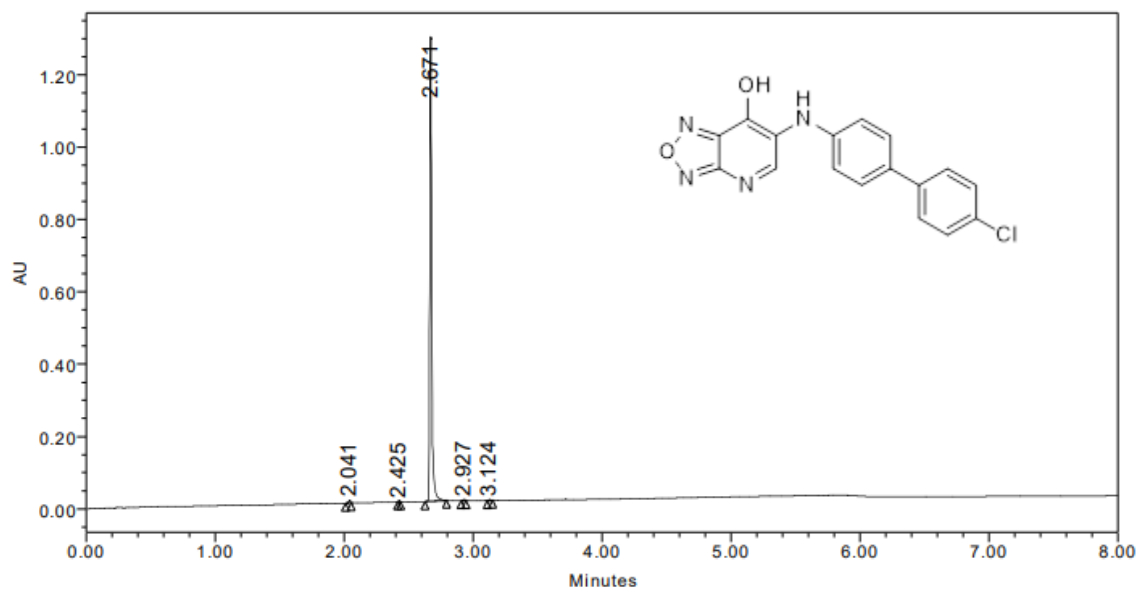

Method one used. Retention time 2.61 minutes, percent purity 99.14%

7al

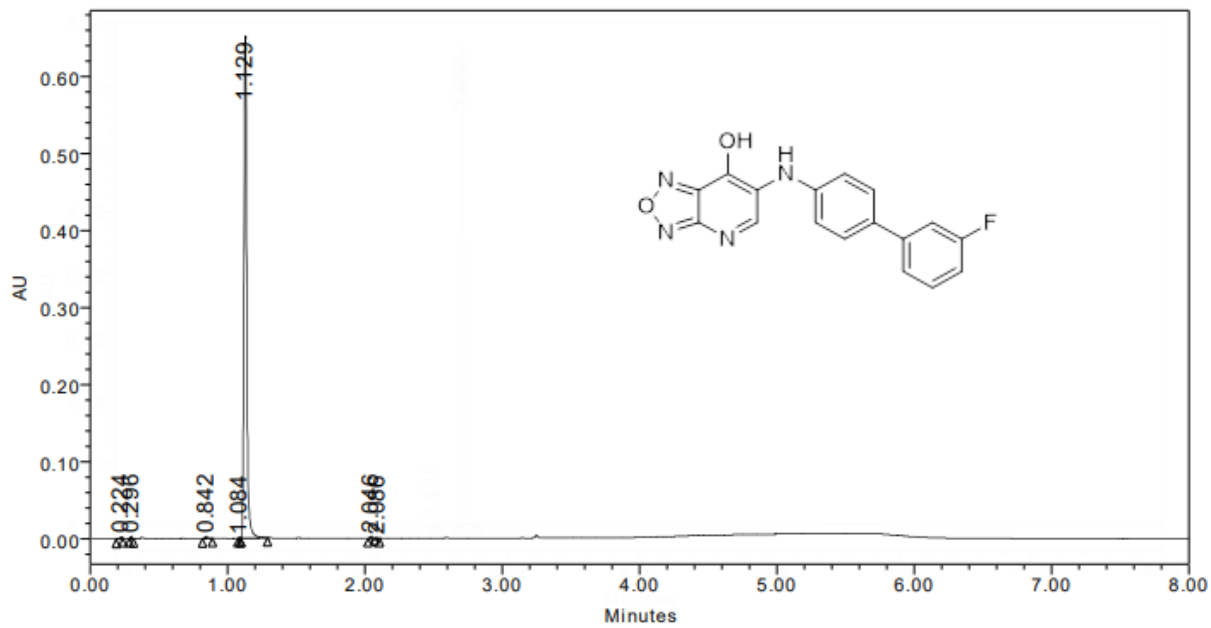

Method two used. Retention time 1.13 minutes, percent purity 98.93 %

SHO1122147

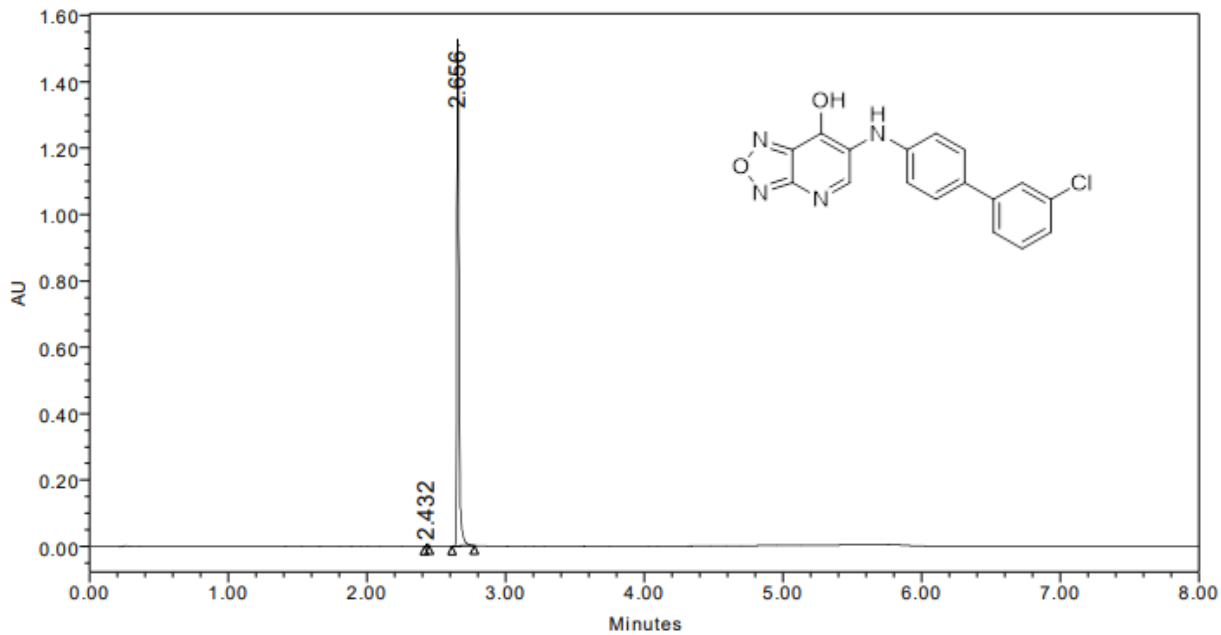

Method one used. Retention time 2.66 minutes, percent purity 99.65%

<sup>1</sup>H NMR (400 MHz, Acetone-*d*<sub>6</sub>) of SHO1122147

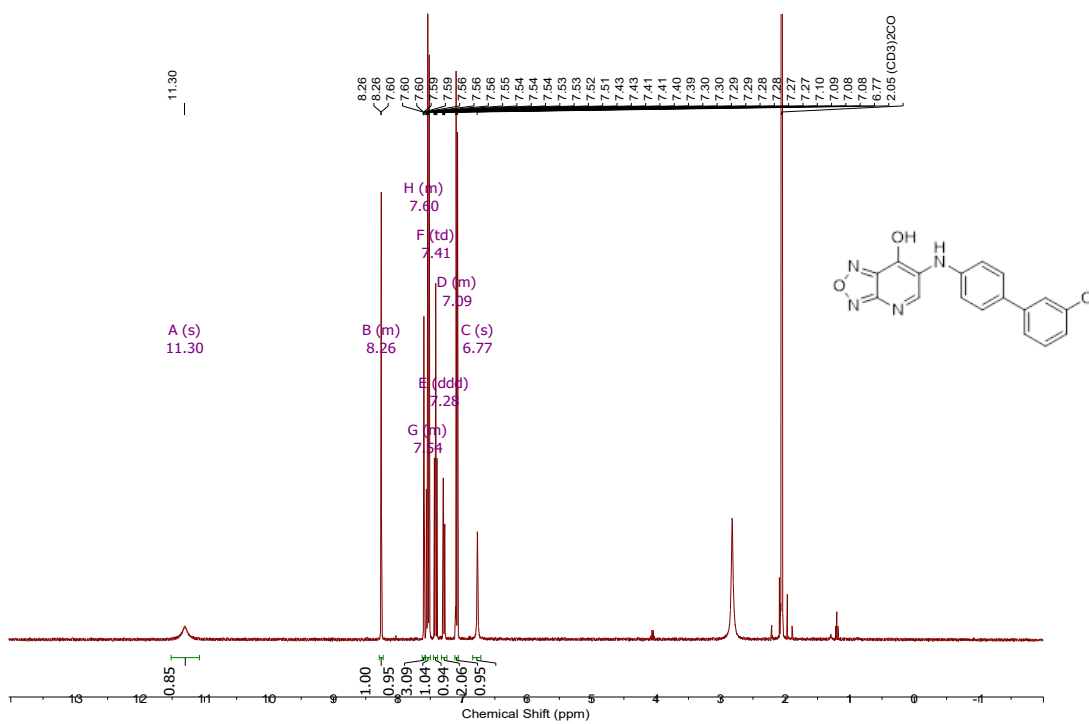

<sup>13</sup>C NMR (126 MHz, Acetone-*d*<sub>6</sub>) of SHO1122147

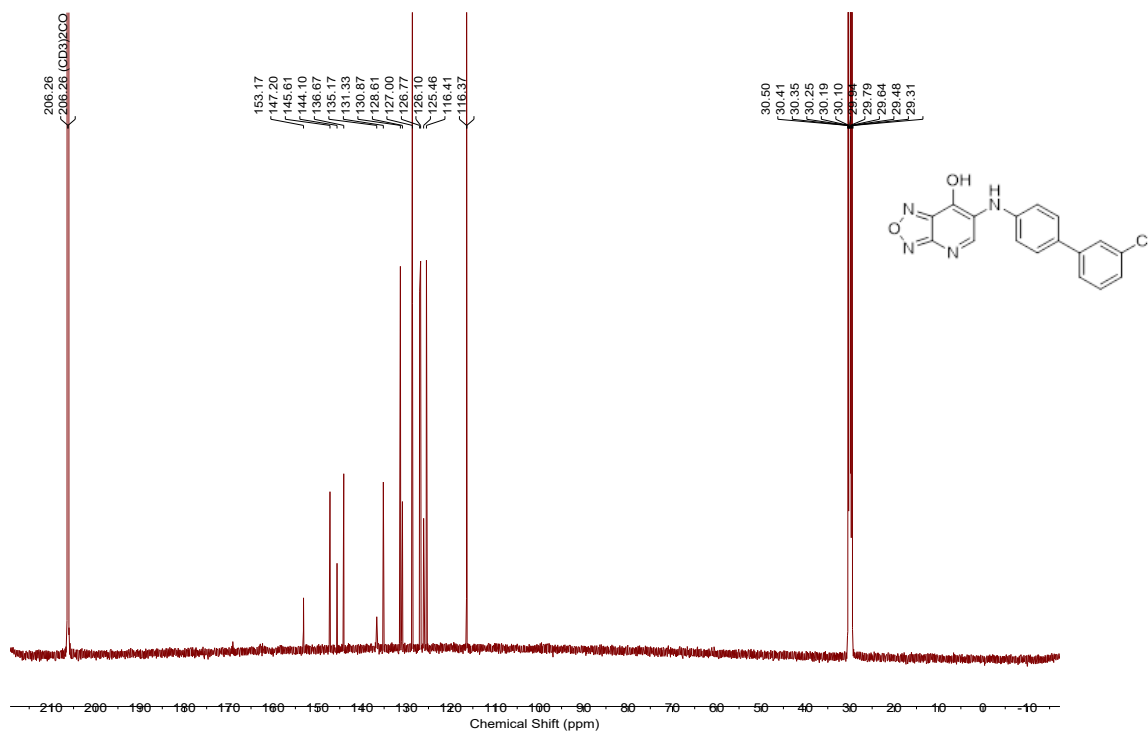

# HRMS of SHO1122147

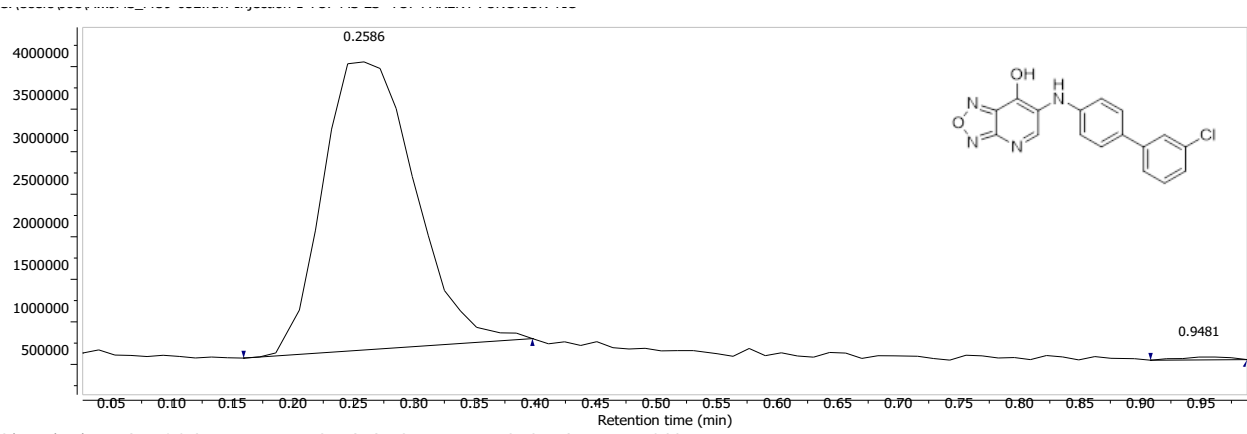

C:\Users\Joe\A...JMS\_MU9-052.raw Injection 1 TOF MS ES- TOF PARENT FUNCTION MS - spectrum 0.26

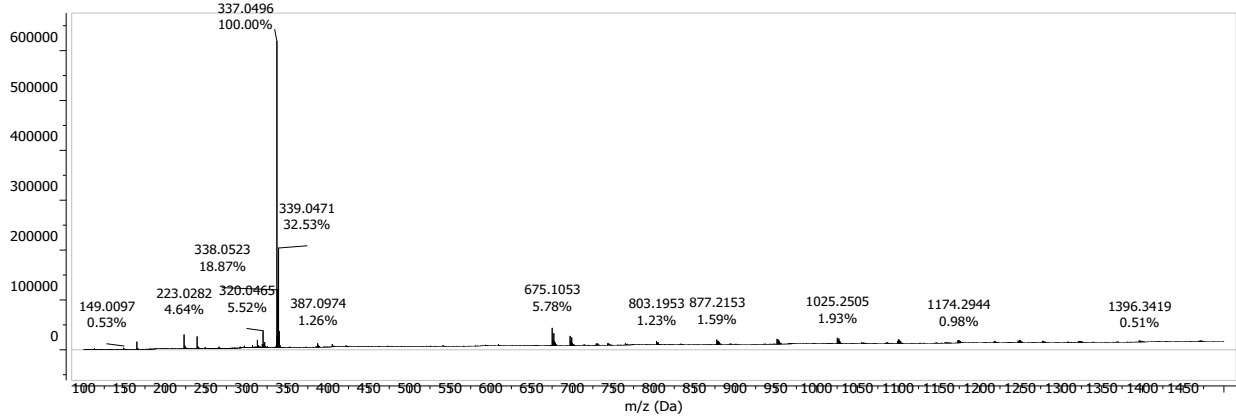

Supplement: jm4c02366_si_002.pdf [file jm4c02366_si_002.pdf]
